# Supplementary material for: Kappa opioid receptor in nucleus accumbens regulates depressive-like behaviors following prolonged morphine withdrawal in mice
Source: PubMed Central journal article supplement — iScience. 2023 Aug 3;26(9):107536. doi: 10.1016/j.isci.2023.107536 (PMC10448166; doi:10.1016/j.isci.2023.107536), 2023-08-03
Supplement: mmc1.pdf [file mmc1.pdf]

iScience, Volume 26

## **Supplemental information**

**Kappa opioid receptor in nucleus accumbens  
regulates depressive-like behaviors following  
prolonged morphine withdrawal in mice**

**Jinyu Zhang, Ye Lu, Min Jia, Yuying Bai, Lulu Sun, Ziqing Dong, Wenrong Tian, Fangyuan Yin, Shuguang Wei, and Yunpeng Wang**

## Supplementary tables

**Table S1** HAM-D scores of placebo treatment in moderate depression patients (n=17). Related to Table 2.

| No. | HAM-D scores | 2W | 4W | 6W | 8W |
|-----|--------------|----|----|----|----|
| 1   | 19           | 15 | 17 | 19 | 19 |
| 2   | 20           | 22 | 17 | 10 | 12 |
| 3   | 23           | 16 | 15 | 15 | 8  |
| 4   | 19           | 21 | 23 | 20 | 20 |
| 5   | 24           | 20 | 23 | 15 | 22 |
| 6   | 18           | 12 | 17 | 10 | 15 |
| 7   | 22           | 20 | 17 | 14 | 9  |
| 8   | 24           | 21 | 18 | 19 | 21 |
| 9   | 22           | 19 | 14 | 21 | 17 |
| 10  | 23           | 22 | 17 | 20 | 22 |
| 11  | 24           | 24 | 23 | 24 | 24 |
| 12  | 22           | 17 | 13 | 11 | 9  |
| 13  | 18           | 14 | 10 | 13 | 15 |
| 14  | 20           | 14 | 10 | 7  | 6  |
| 15  | 18           | 18 | 14 | 15 | 18 |
| 16  | 22           | 24 | 25 | 20 | 22 |
| 17  | 21           | 20 | 21 | 25 | 20 |

**Table S2** HAMD scores of escitalopram treatment in moderate depression patients (n=21). Related to Table 2.

| <b>No.</b> | <b>HAM-D scores</b> | <b>2W</b> | <b>4W</b> | <b>6W</b> | <b>8W</b> |
|------------|---------------------|-----------|-----------|-----------|-----------|
| 1          | 23                  | 17        | 18        | 15        | 11        |
| 2          | 19                  | 19        | 22        | 20        | 20        |
| 3          | 20                  | 18        | 14        | 11        | 10        |
| 4          | 24                  | 19        | 23        | 15        | 15        |
| 5          | 18                  | 10        | 13        | 11        | 8         |
| 6          | 24                  | 18        | 13        | 15        | 10        |
| 7          | 21                  | 22        | 19        | 20        | 22        |
| 8          | 22                  | 20        | 18        | 20        | 14        |
| 9          | 19                  | 19        | 23        | 20        | 18        |
| 10         | 20                  | 22        | 17        | 15        | 16        |
| 11         | 24                  | 17        | 12        | 11        | 11        |
| 12         | 22                  | 16        | 14        | 11        | 13        |
| 13         | 18                  | 15        | 9         | 8         | 5         |
| 14         | 19                  | 22        | 19        | 16        | 16        |
| 15         | 18                  | 13        | 12        | 7         | 6         |
| 16         | 22                  | 24        | 25        | 20        | 18        |
| 17         | 20                  | 15        | 10        | 7         | 7         |
| 18         | 21                  | 20        | 21        | 25        | 22        |
| 19         | 19                  | 15        | 9         | 8         | 6         |
| 20         | 23                  | 23        | 17        | 19        | 16        |
| 21         | 22                  | 16        | 12        | 14        | 12        |

**Table S3** HAM-D scores of placebo treatment in severe depression patients (n=12). Related to Table 3.

| <b>No.</b> | <b>HAM-D scores</b> | <b>2W</b> | <b>4W</b> | <b>6W</b> | <b>8W</b> |
|------------|---------------------|-----------|-----------|-----------|-----------|
| 1          | 24                  | 22        | 24        | 25        | 19        |
| 2          | 26                  | 28        | 22        | 24        | 24        |
| 3          | 25                  | 18        | 21        | 16        | 10        |
| 4          | 22                  | 19        | 16        | 20        | 18        |
| 5          | 24                  | 23        | 24        | 20        | 21        |
| 6          | 22                  | 19        | 12        | 17        | 20        |
| 7          | 28                  | 24        | 18        | 13        | 12        |
| 8          | 26                  | 24        | 26        | 19        | 21        |
| 9          | 27                  | 23        | 22        | 19        | 21        |
| 10         | 26                  | 25        | 21        | 24        | 25        |
| 11         | 24                  | 24        | 23        | 22        | 25        |
| 12         | 26                  | 21        | 22        | 15        | 20        |

**Table S4** HAM-D scores of escitalopram treatment in severe depression patients (n=11). Related to Table 3.

| <b>No.</b> | <b>HAM-D scores</b> | <b>2W</b> | <b>4W</b> | <b>6W</b> | <b>8W</b> |
|------------|---------------------|-----------|-----------|-----------|-----------|
| 1          | 26                  | 20        | 23        | 16        | 12        |
| 2          | 28                  | 28        | 25        | 24        | 25        |
| 3          | 29                  | 26        | 23        | 25        | 18        |
| 4          | 29                  | 26        | 24        | 21        | 20        |
| 5          | 28                  | 20        | 22        | 18        | 14        |
| 6          | 25                  | 20        | 21        | 16        | 11        |
| 7          | 27                  | 22        | 23        | 19        | 16        |
| 8          | 26                  | 26        | 19        | 23        | 25        |
| 9          | 24                  | 20        | 23        | 22        | 18        |
| 10         | 25                  | 26        | 29        | 24        | 19        |
| 11         | 26                  | 20        | 22        | 16        | 10        |

## Supplementary figures and legends

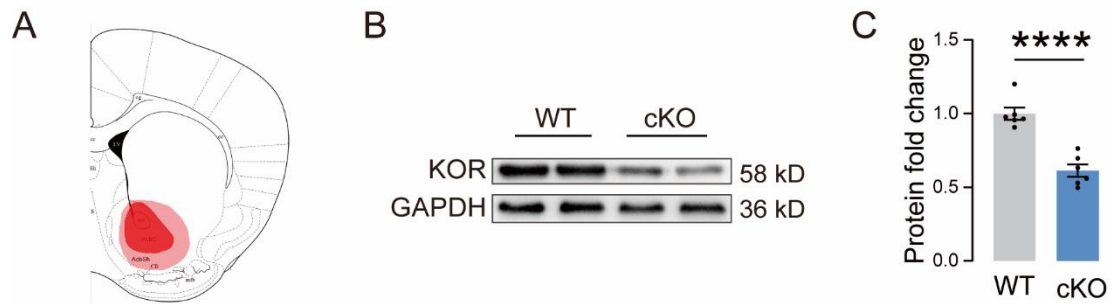

**FIGURE S1 Knockdown of KOR in the NAc in  $KOR^{loxP/loxP}$  mice. Related to Figure 4.** (A) The schematic diagram of showing the maximum and minimum scope of virus diffusion. (B) Representative Western blot images. (C) KOR protein expression levels in the NAc of the cKO mice were decreased. The protein levels of the WT control group are set as 1.  $n=6$  per group for analysis. \*\*\*\* $p < 0.0001$ . Protein levels were analyzed with Unpaired t test. The WT control group was compared with cKO group. The values represent the mean  $\pm$  SEM.

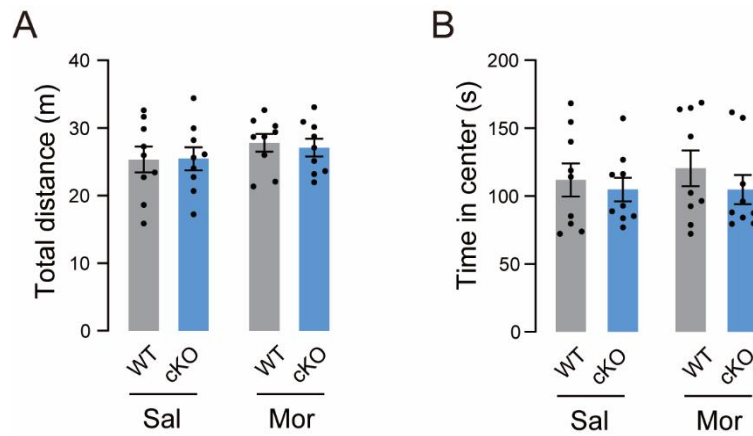

**FIGURE S2 The locomotor activity after morphine withdrawal in  $KOR^{loxP/loxP}$  mice. Related to Figure 4.** (A) The total distance. (B) The time spent in center of the open field.  $n=9$  per group. The data of locomotor activity were analyzed with two-way ANOVA, followed by Sidak's post hoc test. Sal-treated WT mice were compared with Mor-treated WT mice. Mor-treated WT mice were compared with Mor-treated cKO mice. The values represent the mean  $\pm$  SEM.

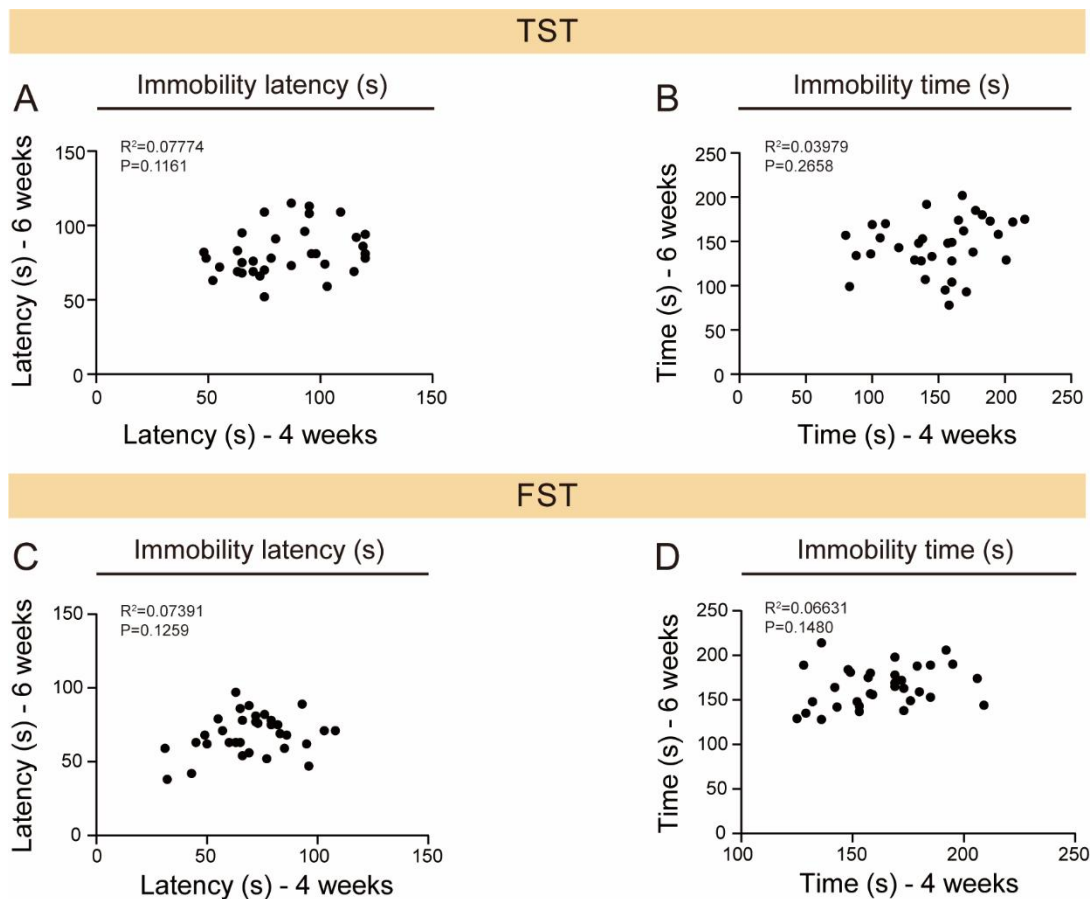

**FIGURE S3** The correlation analysis of immobility behavior 4 weeks and 6 weeks after morphine withdrawal in the experiment of the single norBNI application. Related to Figure 5. (A) The correlation analysis of immobility latency in TST 4 weeks and 6 weeks after morphine withdrawal. Pearson correlation,  $R^2 = 0.07774$ ,  $P=0.1161$ . (B) The correlation analysis of immobility time in TST 4 weeks and 6 weeks after morphine withdrawal. Pearson correlation,  $R^2 = 0.03979$ ,  $P=0.2658$ . (C) The correlation analysis of immobility latency in FST 4 weeks and 6 weeks after morphine withdrawal. Pearson correlation,  $R^2 = 0.07391$ ,  $P=0.1259$ . (D) The correlation analysis of immobility time in FST 4 weeks and 6 weeks after morphine withdrawal. Pearson correlation,  $R^2 = 0.06631$ ,  $P=0.1480$ .



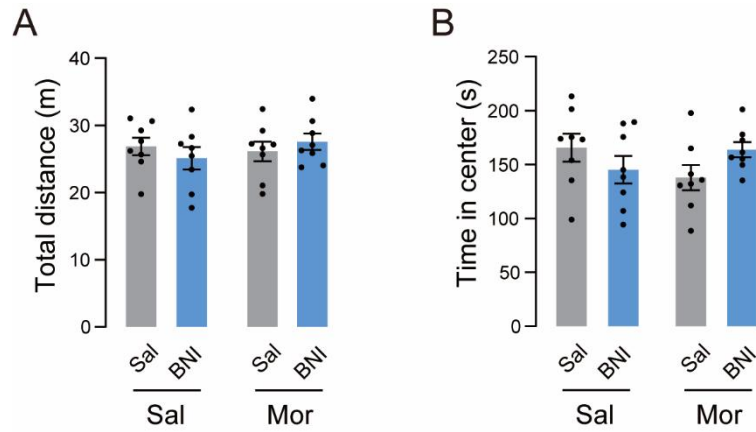

**FIGURE S4 The locomotor activity after morphine withdrawal in mice with repeated norBNI application. Related to Figure 6.** (A) The total distance. (B) The time spent in center of the open field.  $n=8$  per group. The data of locomotor activity were analyzed with two-way ANOVA, followed by Sidak's post hoc test. Sal-Sal-treated mice were compared with Mor-Sal-treated mice. Mor-Sal-treated mice were compared with Mor-BNI-treated mice. The values represent the mean  $\pm$  SEM.
